# Supplementary material for: N-Doped Carbon Dots Derived from Melamine and Triethanolamine for Selective Sensing of Fe3+ Ions
Source: Hindawi journal article supplement (doi:10.1155/2021/8275987), 2021-10-02
Supplement: f1 [file 8275987.f1.pdf]

# **N-doped carbon dots derived from melamine and triethanolamine for selective sensing of Fe<sup>3+</sup> ions**

Sathishkumar Munusamy<sup>a</sup>, Sathish Sawminathan<sup>b</sup>, Thanigaivelan Arumugham<sup>c</sup>,  
Maura Casales Diaz<sup>d</sup>, Srinivas Godavarthi<sup>e</sup>, and Mohan Kumar Kesarla<sup>d,\*</sup>

<sup>a</sup>*Institute of chemical biology and nanomedicine, State key laboratory of chemo/Bio-sensing and Chemometrics, College of Chemistry and Chemical Engineering, Hunan University, Changsha 410082, P.R.China.*

<sup>b</sup>*Department of Chemistry, School of Advanced Sciences and Vellore Institute of Technology, Vellore-632014, India.*

<sup>c</sup>*Department of Chemical Engineering, Khalifa University, 127788, Abu Dhabi, United Arab Emirates.*

<sup>d</sup>*Instituto de Ciencias Físicas, Universidad Nacional Autónoma de México, Avenida Universidad s/n, 62210 Cuernavaca, MOR, México*

<sup>e</sup>*CONACYT–Universidad Juárez Autónoma de Tabasco, Centro de Investigación de Ciencia y Tecnología Aplicada de Tabasco (CICTAT), Cunduacán C.P., 86690, Mexico*

## **Supporting Information Contents**

|                                                                                                   |          |
|---------------------------------------------------------------------------------------------------|----------|
| <b>Figure S1.</b> X-ray diffraction patterns of as prepared NCDs.                                 | <b>2</b> |
| <b>Figure S2.</b> FTIR spectrum of as synthesized NCDs.                                           | <b>3</b> |
| <b>Figure S3.</b> Absorption changes at 270nm with increasing concentration of Fe <sup>3+</sup> . | <b>4</b> |
| <b>Figure S4:</b> FT-IR spectra of NCDs with Fe <sup>3+</sup> and Cu <sup>2+</sup>                | <b>5</b> |
| <b>Table S1.</b> Comparison of LOD of Fe <sup>3+</sup> detection reported in recent papers        | <b>6</b> |

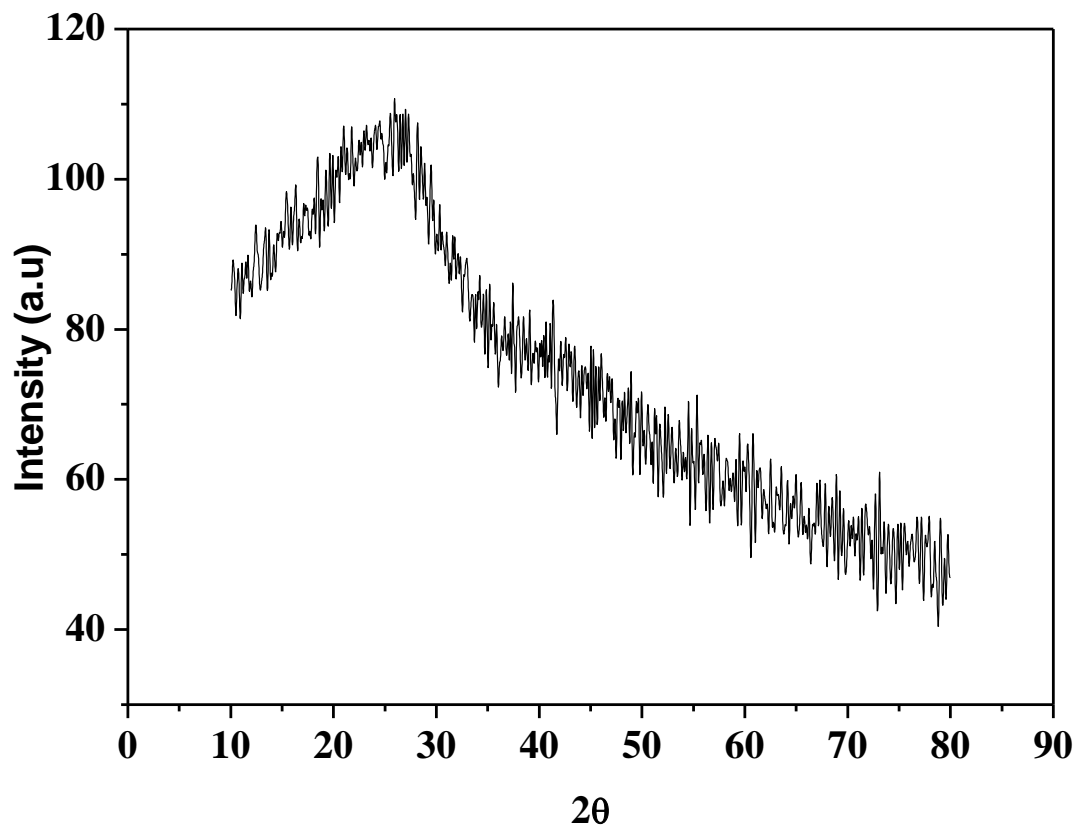

**Figure S1: X-ray diffraction patterns of as prepared NCDs.**

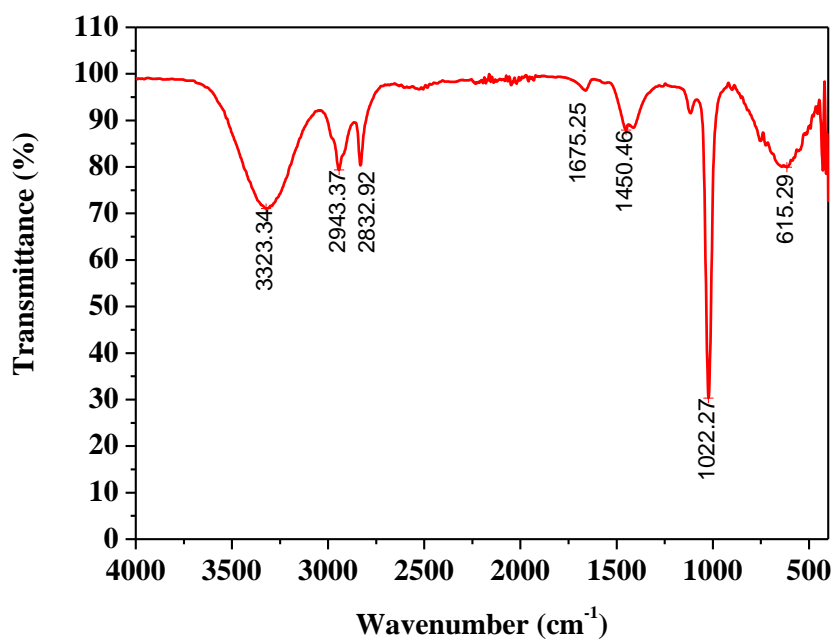

**Figure S2.** FT-IR spectrum of as synthesized NCDs.

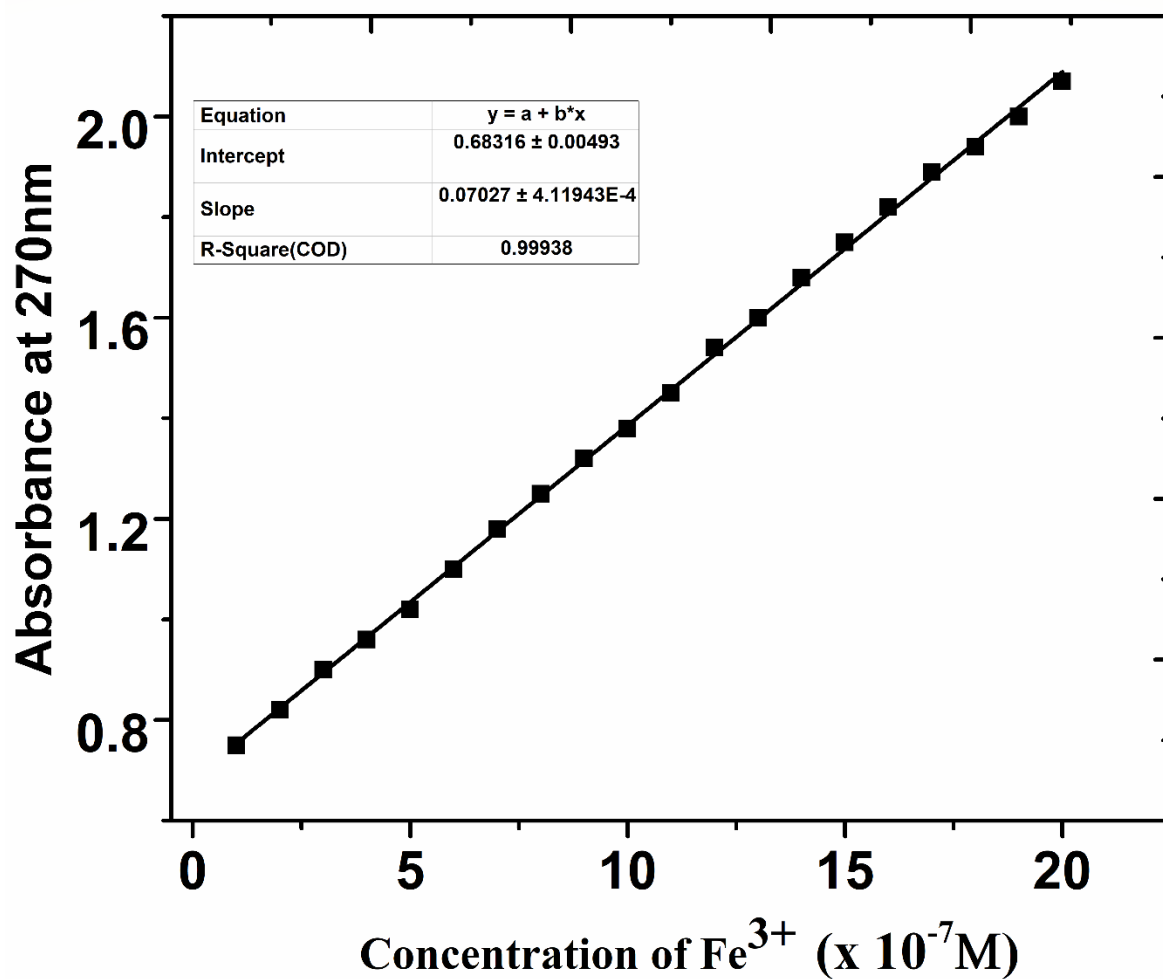

Figure S3. Absorption changes at 270nm with increasing concentration of Fe<sup>3+</sup>.

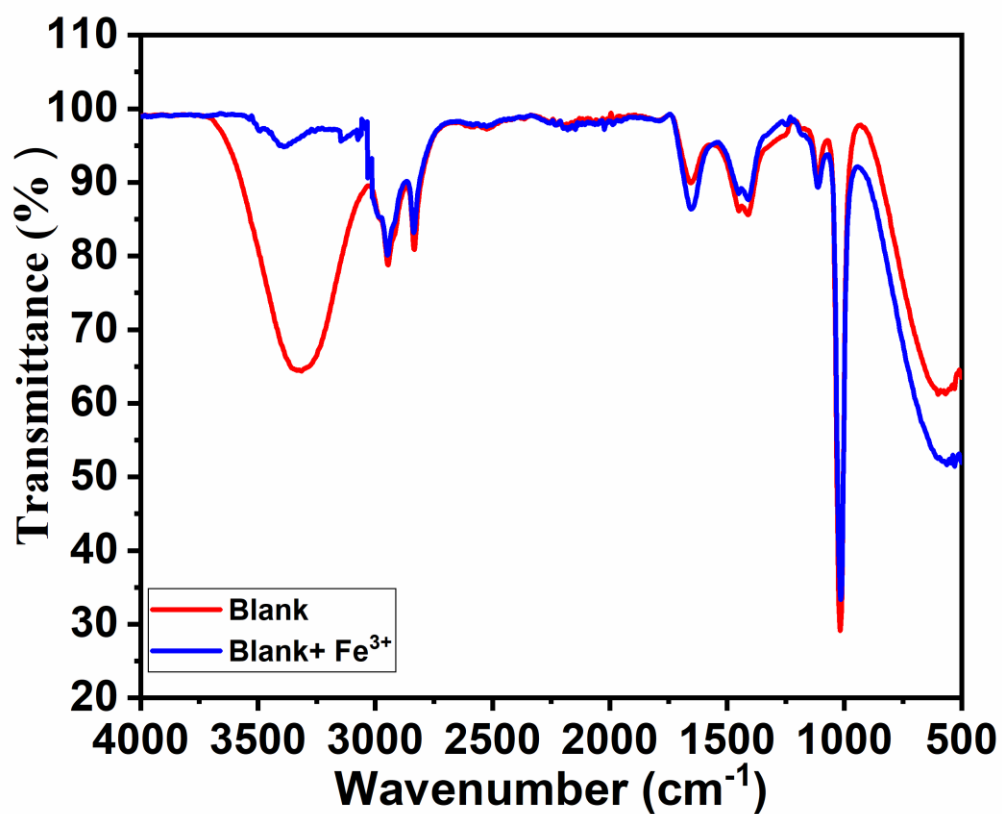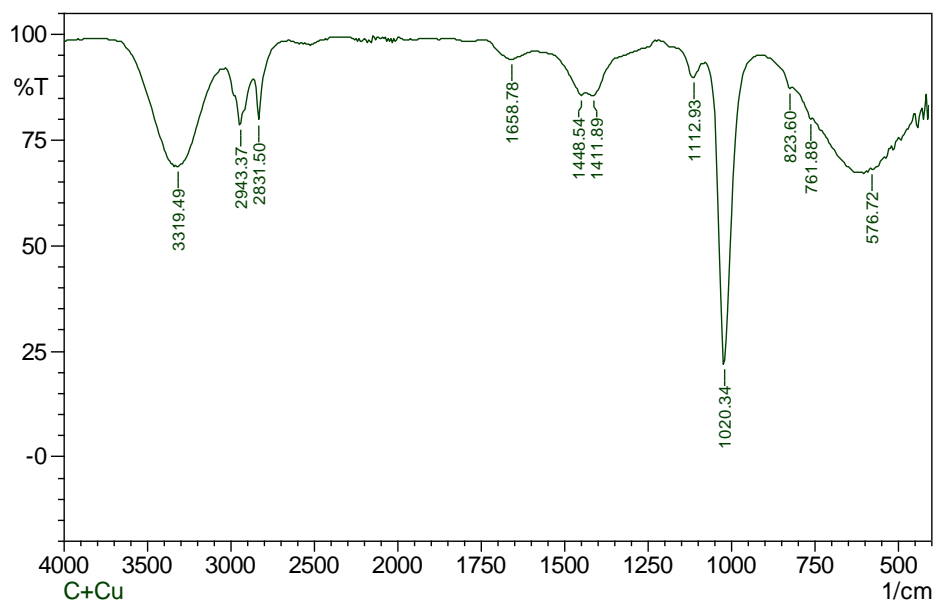

**Figure S4:** FT-IR spectra of NCDs with  $\text{Fe}^{3+}$  and  $\text{Cu}^{2+}$

**Table S1.** Comparison of LOD of Fe<sup>3+</sup> detection reported in recent papers based on chemosensors and nanomaterials.

| S.No      | Reported Probe                                         | LOD                  | Reference                                                                                                                                              |
|-----------|--------------------------------------------------------|----------------------|--------------------------------------------------------------------------------------------------------------------------------------------------------|
| 1         | Salicylaldehyde based Schiff base                      | 0.163 & 3.99 $\mu$ M | Mater. Chem. Front., 2020,4, 1471-1482                                                                                                                 |
| 2         | N-doped carbon dots                                    | 42 nm                | Analyst, 2020,145, 5450-5457                                                                                                                           |
| 3         | N-doped carbon dots                                    | 0.18 $\mu$ M         | Analyst, 2020,145, 4931-4936                                                                                                                           |
| 4         | Triazole Based                                         | 82 & 93 $\mu$ M      | Asian J. Org. Chem. 2020, 9, 1081                                                                                                                      |
| 5         | Glycoluril based                                       | 30 $\mu$ M           | ChemistrySelect 2020, 5, 1878                                                                                                                          |
| 6         | Benzothiazolo-Pyrimidine-Based                         | 0.16 $\mu$ M         | ChemistrySelect 2019, 4, 4185                                                                                                                          |
| 7         | NCQDs prepared from tartaric acid and L-arginine.      | 0.5 $\mu$ M          | Microchemical Journal, 2020,158, 105142                                                                                                                |
| 8         | Carbon quantum dots from pine wood                     | 355.4 nM             | Journal of Cleaner Production, 2020, 263, 121561                                                                                                       |
| 9         | N and S co-doped carbon dots                           | 300 nM               | Materials Science and Engineering: C, 2019, 99, 611-619                                                                                                |
| 10        | Carbon quantum dots from Mexican Mint                  | 0.53 $\mu$ M         | Environmental Research, 2021, 111263 In Press. <a href="https://doi.org/10.1016/j.envres.2021.111263">https://doi.org/10.1016/j.envres.2021.111263</a> |
| 11        | Carbon quantum dots                                    | 5.23 $\mu$ M         | Inorganic Chemistry Communications, 2021, 130, 108636                                                                                                  |
| 12        | Carbon quantum dots from phenylalanine and citric acid | 0.72 $\mu$ M         | Spectrochimica Acta Part A: Molecular and Biomolecular Spectroscopy, 2020, 229, 117944                                                                 |
| 13        | Carbon dots from seville orange                        | 0.53 $\mu$ M         | Microchemical Journal, 2020, 159, 105357                                                                                                               |
| 14        | Terbium metal-organic framework                        | 0.936 $\mu$ M        | Journal of Solid State Chemistry, 2021, 294, 121835                                                                                                    |
| <b>15</b> | <b>NCDs</b>                                            | <b>216 nM</b>        | <b>This work</b>                                                                                                                                       |
